# Supplementary material for: DDX5: an expectable treater for viral infection- a literature review
Source: PubMed Central journal article supplement — Ann Transl Med. 2022 Jun;10(12):712. doi: 10.21037/atm-22-2375 (PMC9279824; doi:10.21037/atm-22-2375), 2022-06
Supplement: atm-10-12-712-rc.pdf [file atm-10-12-712-rc.pdf]

## Narrative Review Checklist

| Section/Topic             | Item No | Item                                                                                                                                                                               | Reported on Page Number/Line Number | Reported on Section/Paragraph |
|---------------------------|---------|------------------------------------------------------------------------------------------------------------------------------------------------------------------------------------|-------------------------------------|-------------------------------|
| <b>TITLE</b>              |         |                                                                                                                                                                                    |                                     |                               |
| Title                     | 1       | Identify the report as a Narrative Review or Literature Review.                                                                                                                    | Page 1/Line 3                       | Title/Paragraph 1             |
| <b>ABSTRACT</b>           |         |                                                                                                                                                                                    |                                     |                               |
| Structured summary        | 2       | Provide a structured summary with the subsections as: Background and Objective, Methods, Key Content and Findings, Conclusions.                                                    | Page1/Line 31                       | Abstract/Paragraph 1          |
| <b>INTRODUCTION</b>       |         |                                                                                                                                                                                    |                                     |                               |
| Rationale/background      | 3       | Describe the rationale for the review in the context of what is already known.                                                                                                     | Page 2/Line 22                      | Introduction/Paragraph 1      |
| Objectives                | 4       | Specify the key question(s) identified for the review topic.                                                                                                                       | Page3/Line 7                        | Introduction/Paragraph 2      |
| <b>METHODS</b>            |         |                                                                                                                                                                                    |                                     |                               |
| Research selection        | 5       | Specify the process for identifying the literature search (eg, years considered, language, publication status, study design, and databases of coverage).                           | Page 3/Line 16                      | Method/Paragraph 1            |
| <b>DISCUSSION/SUMMARY</b> |         |                                                                                                                                                                                    |                                     |                               |
| Narrative                 | 6       | Discuss: 1) research reviewed including fundamental or key findings, 2) limitations and/or quality of research reviewed, and 3) need for future research.                          | Page 14/Line 24                     | Discussion/Paragraph 1        |
| Summary                   | 7       | Provide an overall interpretation of the narrative review in the context of clinical practice for health professionals, policy development and implementation, or future research. | Page 16/Line 11                     | Conclusion/Paragraph 1        |

Article Information: <https://dx.doi.org/10.21037/atm-22-2375>

\*As the checklist was provided upon initial submission, the page number/line number reported may be changed due to copyediting and may not be referable in the published version. In this case, the section/paragraph may be used as an alternative reference.
